# Supplementary material for: Number and Size Distribution of Colorectal Adenomas under the Multistage Clonal Expansion Model of Cancer
Source: PLOS journal article supplement (doi:10.1371/journal.pcbi.1002213), 2011-10-13
Supplement: S1 (10.1371/journal.pcbi.1002213.s001) [file journal.pcbi.1002213.s001]

# Number and Size Distribution of Colorectal Adenomas under the Multistage Clonal Expansion Model of Cancer: Supplementary Material

Anup Dewanji, Jihyoun Jeon, Rafael Meza, E. Georg Luebeck

This supplement covers special cases that were not explicitly treated in the main text (e.g., replacing PP-type pre-initiation steps with AD-type steps) and the generalization to models with more than two pre-initiation steps, i.e.,  $K > 2$ . In addition, we introduce a tabular glossary (Table 1 in Text S1) which summarize our notation and succinctly define the model parameters and terminology in use.

## Number and Size Distribution of detectable adenomas for $K = 2$

### PP for $P_1$ - and AD for $P_2$ -mutation for $K = 2$

For  $K = 2$ , there are two pre-initiation events ( $P_1$ - and  $P_2$ -mutations) before initiation occurs. In the main text, we have described a modeling scenario, in which both  $P_1$ - and  $P_2$ -mutations are PP.

In many situations, the second pre-initiation (that is, the  $P_2$ -mutation) appears to be rare so that, in practice, there can be at most one such event from each  $P_1$ -cell. Then, a AD-type transition for the  $P_2$ -mutation is an alternative, which simplifies the results considerably. Each  $P_1$ -cell, in this modeling, has a random waiting time with density  $f_1(\cdot)$ , before converting into a  $P_2$ -cell, which then becomes a detectable adenoma at time  $t$  with probability  $p_2^{(1)}(s_2, t)$  (See the section ‘Number and Size Distribution for  $K = 2$ ’ in the main text). Therefore, a  $P_1$ -cell born at time  $s_1$  has the probability

$$p_1^{(AD)}(s_1, t) = \int_{s_1}^t f_1(s_2 - s_1) p_2^{(1)}(s_2, t) ds_2$$

to become detectable at time  $t$ .

**Adenoma Prevalence:** The number of detectable adenomas  $N(t)$  can, therefore, be written as a filtered PP, as in the section ‘Number and Size Distribution for  $K = 1$ ’ in the main text, with  $p_1^{(1)}(s_1, t)$  replaced by  $p_1^{(AD)}(s_1, t)$ . Consequently, the generation of  $P_1$ -cells, which lead to detectable adenomas at time  $t$ , follows a non-homogeneous PP with rate  $\mu_0(s_1)X(s_1)p_1^{(AD)}(s_1, t)$ , for  $s_1 \leq t$ , and  $N(t)$  follows a Poisson distribution with mean  $\int_0^t \mu_0(s_1)X(s_1)p_1^{(AD)}(s_1, t)ds_1$ . Thus, the adenoma prevalence is given by

$$1 - \exp \left[ - \int_0^t \mu_0(s_1)X(s_1) \int_{s_1}^t f_1(s_2 - s_1) p_2^{(1)}(s_2, t) ds_2 ds_1 \right].$$

**Detection probability and size distribution of adenomas:** The probability of detecting an adenoma at age  $t$  with the detection threshold  $y_0$  is given by

$$\begin{aligned} P[Y(t) > y_0] &= \sum_{i=y_0+1}^{\infty} \int_0^t \frac{\mu_0(s_1)X(s_1) \int_{s_1}^t f_1(s_2-s_1)P[Y(s_2,t)=i|Y(s_2,s_2)=0]ds_2}{\int_0^t \mu_0(s_1)X(s_1) \int_{s_1}^t f_1(s_2-s_1)ds_2ds_1} ds_1 \\ &= \frac{\int_0^t \mu_0(s_1)X(s_1)p_1^{(AD)}(s_1,t)ds_1}{\int_0^t \mu_0(s_1)X(s_1) \int_{s_1}^t f_1(s_2-s_1)ds_2ds_1}. \end{aligned} \quad (1)$$

And the size distribution of a detectable adenoma at age  $t$  is given by

$$\begin{aligned} P[Y(t) = y|Y(t) > y_0] &= \frac{\int_0^t \mu_0(s_1)X(s_1) \int_{s_1}^t f_1(s_2-s_1)P[Y(s_2,t)=y|Y(s_2,s_2)=0]ds_2ds_1}{\int_0^t \mu_0(s_1)X(s_1) \int_{s_1}^t f_1(s_2-s_1)p_2^{(1)}(s_2,t)ds_2ds_1} \\ &= \frac{\int_0^t \mu_0(s_1)X(s_1) \int_{s_1}^t f_1(s_2-s_1)P[Y(s_2,t)=y|Y(s_2,s_2)=0]ds_2ds_1}{\int_0^t \mu_0(s_1)X(s_1)p_1^{(AD)}(s_1,t)ds_1}. \end{aligned} \quad (2)$$

**Likelihood for the number and size of detectable adenomas:** Following the derivation of  $L_{11}$  in the section ‘Number and Size Distribution for  $K = 1$ ’ in the main text, the likelihood of observing  $\{N(t) = n, (Y_i(t) = y_i, i = 1, \dots, n)\}$  is given by

$$\begin{aligned} L_2 &\propto \exp\left[-\int_0^t \mu_0(s_1)X(s_1)p_1^{(AD)}(s_1,t)ds_1\right] \times \\ &\quad \prod_{i=1}^n \left\{ \int_0^t \mu_0(s_1)X(s_1) \int_{s_1}^t f_1(s_2-s_1)P[Y(s_2,t)=y_i|Y(s_2,s_2)=0]ds_2ds_1 \right\}, \end{aligned}$$

**Extension to observations in individuals with no prior CRC.** The expressions above can be conditioned on observations in asymptomatic cancer-free individuals as described in the subsection ‘PP for both  $P_1$ - and  $P_2$ -mutations’ in the main text. The number of detectable adenomas at time  $t$  in cancer-free individual,  $N^*(t)$ , follows a Poisson distribution with mean  $\int_0^t \mu_0(s_1)X(s_1) \int_{s_1}^t f_1(s_2-s_1)S_2(s_2,t)p_2^{(1*)}(s_2,t)ds_2ds_1$ . Therefore, the adenoma prevalence conditioned on no prior CRC is given by

$$1 - \exp\left[-\int_0^t \mu_0(s_1)X(s_1) \int_{s_1}^t f_1(s_2-s_1)S_2(s_2,t)p_2^{(1*)}(s_2,t)ds_2ds_1\right],$$

where  $p_2^{(1*)}(s_2,t) = P[Y(s_2,t) > y_0|Z(s_2,t) = 0, Y(s_2,s_2) = 0]$ .

**Detection probability and size distribution for adenomas in individuals with no prior CRC:**

We derive the similar expressions in (1) and (2) conditioned on no prior CRC. The probability of detecting an adenoma at age  $t$  with the detection threshold  $y_0$  conditioned on no prior CRC is given by

$$\begin{aligned} P[Y(t) > y_0|Z(t) = 0] &= \sum_{i=y_0+1}^{\infty} \int_0^t \frac{\mu_0(s_1)X(s_1) \int_{s_1}^t f_1(s_2-s_1)S_2(s_2,t)P[Y(s_2,t)=i|Z(s_2,t)=0, Y(s_2,s_2)=0]ds_2}{\int_0^t \mu_0(s_1)X(s_1) \int_{s_1}^t f_1(s_2-s_1)S_2(s_2,t)ds_2ds_1} ds_1 \\ &= \frac{\int_0^t \mu_0(s_1)X(s_1) \int_{s_1}^t f_1(s_2-s_1)S_2(s_2,t)p_2^{(1*)}(s_2,t)ds_2ds_1}{\int_0^t \mu_0(s_1)X(s_1) \int_{s_1}^t f_1(s_2-s_1)S_2(s_2,t)ds_2ds_1}. \end{aligned} \quad (3)$$

And the size distribution of a detectable adenoma at age  $t$  conditioned on no prior CRC is as following:

$$\begin{aligned} P[Y(t) = y | Z(t) = 0, Y(t) > y_0] \\ = \frac{\int_0^t \mu_0(s_1) X(s_1) \int_{s_1}^t f_1(s_2 - s_1) S_2(s_2, t) P[Y(s_2, t) = y | Z(s_2, t) = 0, Y(s_2, s_2) = 0] ds_2 ds_1}{\int_0^t \mu_0(s_1) X(s_1) \int_{s_1}^t f_1(s_2 - s_1) S_2(s_2, t) p_2^{(1*)}(s_2, t) ds_2 ds_1}. \end{aligned} \quad (4)$$

## Number and Size Distribution for General $K$

Here we cover the two special cases: (1) when all pre-initiations are of PP-type, and (2) when they are all of AD-type. Figure 1 in Text S1 illustrates the emerging tree-like structure of case (1). It traces a particular stem cell lineage that leads to a  $K$ -stage progenitor cell of an adenoma. The specific notation for this case is introduced below.

### PP for all the $K$ pre-initiations

A generalization of the results for  $K = 2$  in the main text yields

$$\begin{aligned} N(t) &= \sum_{j=1}^{M(t)} N^{(K-1)}(s_{1j}, t) \\ N^{(K-1)}(s_1, t) &= \sum_j N^{(K-2)}(s_1, s_{2j}, t) \\ &\vdots \\ N^{(1)}(s_1, \dots, s_{K-1}, t) &= \sum_j N(s_1, \dots, s_{K-1}, s_{Kj}, t), \end{aligned} \quad (5)$$

where  $N^{(K-1)}(s_{1j}, t)$  is the number of detectable adenomas at time  $t$  emerging from a  $P_1$ -cell born at time  $s_{1j}$ ,  $N^{(K-2)}(s_1, s_{2j}, t)$  the number of detectable adenomas at time  $t$  emerging from a  $P_1$ -cell born at time  $s_1$  and a  $P_2$ -cell born at time  $s_{2j}$ , and so forth, until we reach  $N^{(1)}(s_1, \dots, s_{K-1}, t)$ , which is the sum over all the  $P_K$ -mutations by time  $t$  that occurred at times  $s_{Kj}$ 's and which derive from a (random) ancestry of  $P_l$ -mutations arising at times  $s_l$ , for  $l = 1, \dots, K-1$ . As before,  $N(s_1, \dots, s_K, t) = 1$  if the adenoma is detectable at time  $t$  and 0 otherwise; that is,  $N(s_1, \dots, s_K, t) = I(Y(s_K, t) > y_0)$ . The distribution of this binary random variable is given by

$$p_K^{(1)}(s_K, t) = P[N(s_1, \dots, s_K, t) = 1] = P[Y(s_K, t) > y_0 | Y(s_K, s_K) = 0], \quad (6)$$

which can be calculated using the formula (1) in the subsection ‘Size and detection of adenoma’ in the main text for constant parameters.

Given a sequence of  $K-1$  ancestral mutations with occurrence times  $s_1, \dots, s_{K-1}$ , the occurrences of subsequent  $P_K$ -mutations leading to a detectable adenoma at time  $t$  follow a non-homogeneous PP with

rate  $\mu_{K-1}(s_K)p_K^{(1)}(s_K, t)$ , for  $s_{K-1} \leq s_K \leq t$ , and  $N^{(1)}(s_1, \dots, s_{K-1}, t)$  follows a Poisson distribution with mean  $\int_{s_{K-1}}^t \mu_{K-1}(s_K)p_K^{(1)}(s_K, t)ds_K$ .

**Likelihood for the number and size of detectable adenomas:** As before (see the section ‘Number and Size Distribution for  $K = 2$ ’ in the main text), the occurrences of ‘special’  $P_1$ -mutations, denoted by the process  $M^s(t)$ , that lead to at least one detectable adenoma at time  $t$ , follow a non-homogeneous Poisson process with rate  $\mu_0(s_1)X(s_1)p_1^{(K)}(s_1, t)$ , for  $s_1 \leq t$ , where  $p_1^{(K)}(s_1, t)$  is the probability that a  $P_1$ -cell born at time  $s_1$  leads to at least one detectable adenoma at time  $t$ , after passing sequentially through  $(K - 1)$  more pre-initiation stages. Now, given  $p_K^{(1)}(s_K, t)$  (see (6)), the probability  $p_1^{(K)}(s_1, t)$  can be obtained recursively from

$$\begin{aligned} p_{K-1}^{(K)}(s_{K-1}, t) &= 1 - \exp \left[ - \int_{s_{K-1}}^t \mu_{K-1}(s_K)p_K^{(1)}(s_K, t)ds_K \right], \\ &\vdots \\ p_2^{(K)}(s_2, t) &= 1 - \exp \left[ - \int_{s_2}^t \mu_2(s_3)p_3^{(K)}(s_3, t)ds_3 \right], \\ p_1^{(K)}(s_1, t) &= 1 - \exp \left[ - \int_{s_1}^t \mu_1(s_2)p_2^{(K)}(s_2, t)ds_2 \right]. \end{aligned} \quad (7)$$

Now, let  $(i_1, \dots, i_K)$  be a label enumerating a specific lineage toward a detectable adenoma providing the ancestral information of its entire pathway from the normal stem cell to the founder cell of the adenoma (see Figure 1 in Text S1). Thus, the set of labels  $(i_1, \dots, i_K)$  forms a tree structure branching into  $n$  nodes at the top ( $P_K$ -level) representing the detectable adenomas with sizes  $\{y_i, i = 1, \dots, n\}$ . At the bottom ( $P_1$ -level), there are  $m$  nodes representing the  $m$  ‘special’  $P_1$ -mutations. The  $i_1$ th such node has  $n_{i_1}$  branches with nodes at the  $P_2$ -level, the  $(i_1, i_2)$ th node at  $P_2$ -level has  $n_{i_1 i_2}$  branches with nodes at the  $P_3$ -level, and so forth. Finally, the  $(i_1, \dots, i_{K-1})$ th node at  $P_{K-1}$ -level has  $n_{i_1 \dots i_{K-1}}$  branches with nodes at  $P_K$ -level. Furthermore, let  $Y_{i_1 \dots i_K}(t) = y_{i_1 \dots i_K}$  be the size of the  $(i_1, \dots, i_K)$ th detectable adenoma. Given the Poisson process assumption for the successive generation of these ‘special’ mutations, the joint distribution of  $\{M^s(t) = m\}$  and the different numbers and sizes of detectable adenomas associated with a specific ancestry of pre-initiations is similar to the formula of  $L(m, n_i, y_{ij}, j = 1, \dots, n_i, i = 1, \dots, m)$  in the section ‘Number and Size Distribution for  $K = 2$ ’ in the main text, and the form is as following:

$$\begin{aligned} &e^{-\int_0^t \mu_0(s_1)X(s_1)p_1^{(K)}(s_1, t)ds_1} (m!)^{-1} \prod_{i_1=1}^m \left[ \int_0^t \mu_0(s_1)X(s_1)e^{-\int_{s_1}^t \mu_1(s_2)p_2^{(K)}(s_2, t)ds_2} \right. \\ &\quad \times (n_{i_1}!)^{-1} \prod_{i_2=1}^{n_{i_1}} \left[ \int_{s_1}^t \mu_1(s_2)e^{-\int_{s_2}^t \mu_2(s_3)p_3^{(K)}(s_3, t)ds_3} \right. \\ &\quad \vdots \\ &\quad \times (n_{i_1 \dots i_{K-1}}!)^{-1} \prod_{i_K=1}^{n_{i_1 \dots i_{K-1}}} \left[ \int_{s_{K-1}}^t \mu_{K-1}(s_K)P[Y(s_K, t) = y_{i_1 \dots i_K} | Y(s_K, s_K) = 0]ds_K \right] \cdots ds_1 \Big]. \end{aligned} \quad (8)$$

Note, the typical observation consists of the information at the  $P_K$ -level without a tree structure, whereas the likelihood (8) corresponds to the probability of a particular tree leading to the observed  $P_K$ -level information. Therefore, the likelihood of observing  $n$  detectable adenomas with sizes  $y_i, i = 1, \dots, n$  at age  $t$ , i.e.,  $\{N(t) = n, (Y_i(t) = y_i, i = 1, \dots, n)\}$  can be obtained by summing terms like (8) over all possible trees leading to the given  $P_K$ -level information. In contrast, when explicit ancestral information is available, then (8) is the relevant likelihood.

Conditioning the relevant expressions on observations from individuals with no prior CRC is straightforward but is not explicitly considered here.

### PP for $P_1$ - and AD for all other pre-initiations for General $K$

The results are similar to those in the subsection ‘PP for  $P_1$ - and AD for  $P_2$ -mutation’ above with  $f_1(\cdot)$  replaced by the convolution density  $(f_1 * \dots * f_{K-1})(\cdot)$  and the dummy variable  $s_2$  by  $s_K$ , the time of  $P_K$ -mutation for a normal stem cell. Also,  $p_2^{(1)}(s_2, t)$  is to be replaced by  $p_K^{(1)}(s_K, t)$  and  $Y(s_2, t)$  by  $Y(s_K, t)$ .

### Expected size of detectable adenomas

#### PP for $P_1$ -mutation for $K = 1$

For the case of PP for  $P_1$ -mutation for  $K = 1$ , the expected size of a detectable adenoma is calculated by

$$E[Y(t)|Y(t) > y_0] = \frac{\int_0^t \mu_0(s_1)X(s_1)p_1^{(1)}(s_1, t)E[Y(s_1, t)|Y(s_1, t) > y_0, Y(s_1, s_1) = 0]ds_1}{\int_0^t \mu_0(s_1)X(s_1)p_1^{(1)}(s_1, t)ds_1}. \quad (9)$$

Now conditioning on no prior CRC, the expected size of a detectable adenoma is as following:

$$\begin{aligned} & E[Y(t)|Z(t) = 0, Y(t) > y_0] \\ &= \frac{\int_0^t \mu_0(s_1)X(s_1)S_2(s_1, t)p_1^{(1*)}(s_1, t)E[Y(s_1, t)|Z(s_1, t) = 0, Y(s_1, t) > y_0, Y(s_1, s_1) = 0]ds_1}{\int_0^t \mu_0(s_1)X(s_1)S_2(s_1, t)p_1^{(1*)}(s_1, t)ds_1}. \end{aligned} \quad (10)$$

For constant parameters, the unconditional and conditional (on no prior CRC)  $Y(s_1, t)$  follows a Negative Binomial distribution in the equation (1) and (2) in the main text with  $K = 1$ .

#### PP for both $P_1$ - and $P_2$ -mutations for $K = 2$

Similarly, in the case of PP for both  $P_1$ - and  $P_2$ -mutations for  $K = 2$ , the expected size of a detectable adenoma is simply given by

$$E[Y(t)|Y(t) > y_0] = \frac{\int_0^t \mu_0(s_1)X(s_1) \int_{s_1}^t \mu_1(s_2)p_2^{(1)}(s_2, t)E[Y(s_2, t)|Y(s_2, t) > y_0, Y(s_2, s_2) = 0]ds_2ds_1}{\int_0^t \mu_0(s_1)X(s_1) \int_{s_1}^t \mu_1(s_2)p_2^{(1)}(s_2, t)ds_2ds_1}. \quad (11)$$

And the conditional expected size of a detectable adenoma, given no prior CRC, is given by

$$\begin{aligned} E[Y(t)|Z(t) = 0, Y(t) > y_0] \\ = \frac{\int_0^t \mu_0(s_1)X(s_1)S_3(s_1, t) \int_{s_1}^t \mu_1(s_2)S_2(s_2, t)p_2^{(1*)}(s_2, t)E[Y(s_2, t)|Z(s_2, t) = 0, Y(s_2, t) > y_0, Y(s_2, s_2) = 0]ds_2ds_1}{\int_0^t \mu_0(s_1)X(s_1)S_3(s_1, t) \int_{s_1}^t \mu_1(s_2)S_2(s_2, t)p_2^{(1*)}(s_2, t)ds_2ds_1}. \end{aligned} \quad (12)$$

For constant parameters, the unconditional and conditional (on no prior CRC)  $Y(s_2, t)$  follows a Negative Binomial distribution in the equation (1) and (2) in the main text with  $K = 2$ .

#### PP for $P_1$ - and AD for $P_2$ -mutation for $K = 2$

In the case of PP for  $P_1$ - and AD for  $P_2$ -mutation for  $K = 2$ , the expected size of a detectable adenoma is calculated by

$$E[Y(t)|Y(t) > y_0] = \frac{\int_0^t \mu_0(s_1)X(s_1) \int_{s_1}^t f_1(s_2 - s_1)p_2^{(1)}(s_2, t)E[Y(s_2, t)|Y(s_2, t) > y_0, Y(s_2, s_2) = 0]ds_2ds_1}{\int_0^t \mu_0(s_1)X(s_1)p_1^{(AD)}(s_1, t)ds_1}, \quad (13)$$

and the expected size of a detectable adenoma conditioned on no prior CRC is given by

$$\begin{aligned} E[Y(t)|Z(t) = 0, Y(t) > y_0] \\ = \frac{\int_0^t \mu_0(s_1)X(s_1) \int_{s_1}^t f_1(s_2 - s_1)S_2(u_2, t)p_2^{(1*)}(s_2, t)E[Y(s_2, t)|Z(s_2, t) = 0, Y(s_2, t) > y_0, Y(s_2, s_2) = 0]ds_2ds_1}{\int_0^t \mu_0(s_1)X(s_1) \int_{s_1}^t f_1(s_2 - s_1)S_2(u_2, t)p_2^{(1*)}(s_2, t)ds_2ds_1}. \end{aligned} \quad (14)$$

For constant parameters, the unconditional and conditional (on no prior CRC)  $Y(s_2, t)$  follows a Negative Binomial distribution in the equation (1) and (2) in the main text with  $K = 2$ .

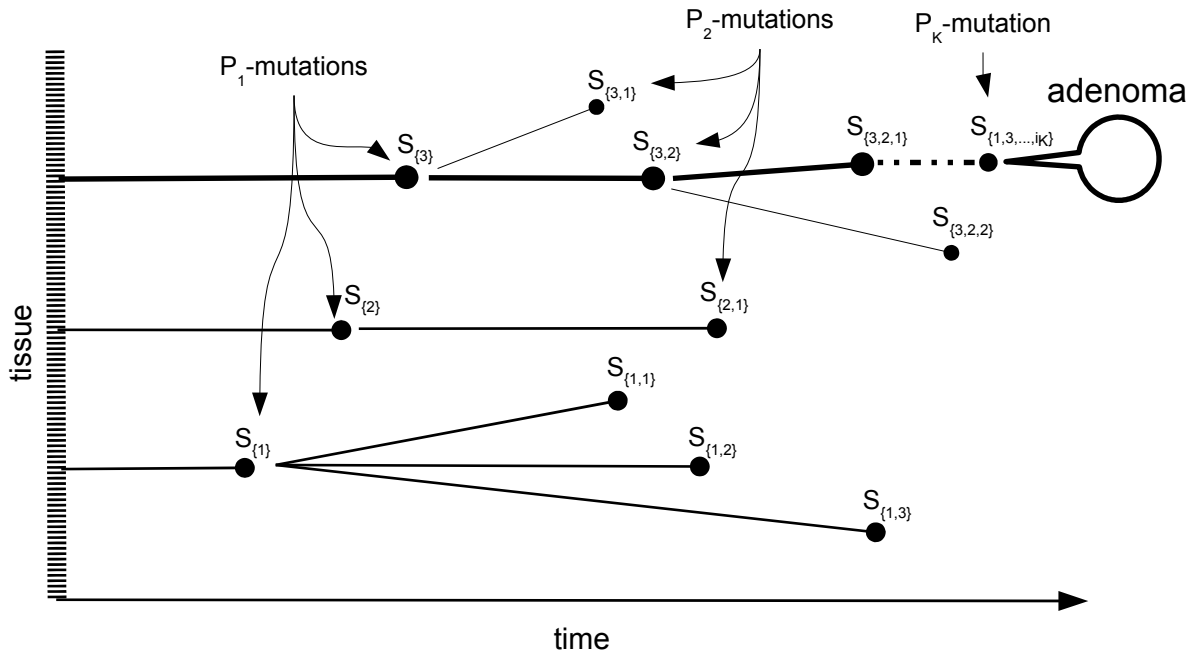

**Figure 1.** Example *PP*-type stem cell lineages in adenoma development for the model with general  $K$ .

**Table 1.** Model parameters, notation and terminology.

| Symbol             | Description                                              | Details                                                                                                                                                                                                                  |
|--------------------|----------------------------------------------------------|--------------------------------------------------------------------------------------------------------------------------------------------------------------------------------------------------------------------------|
| $K$                | Number of pre-initiation stages                          | We present results for $K$ equal to one, two and general $K$ . Stage $K + 1$ represents the adenoma stage in the MSCE model and stage $K + 2$ represents the cancer stage                                                |
| $k$                | pre-initiation stage counter                             | $k = 1, 2, \dots, K$                                                                                                                                                                                                     |
| $P_k$ -mutation    | $k$ th pre-initiation event                              | $k = 1, 2, \dots, K$                                                                                                                                                                                                     |
| $P_k$ -cells       | The cells which have gone through the $P_k$ -mutation    | $k = 0, \dots, K + 1$ . $P_0$ -cells represent the normal stem cells. $P_K$ -cells represent progenitor cells (see below). $P_{K+1}$ represent “initiated cells” (i.e., adenoma cells)                                   |
| $\mu_k(\cdot)$     | Mutation rate of $P_k$ -cells                            | Rate per year per cell. $k = 0, \dots, K$                                                                                                                                                                                |
| $\mu_{K+1}(\cdot)$ | Malignant conversion rate                                | Rate at which adenoma cells ( $P_{K+1}$ -cells) give rise to a clinical cancer                                                                                                                                           |
| PP                 | Poisson Process                                          | The generation of a $P_k$ -cells from a $P_{k-1}$ -cell can be modeled as a non-homogeneous PP with rate $\mu_{k-1}(\cdot)$                                                                                              |
| AD-type transition | Armitage-Doll transition                                 | The generation of a $P_k$ -cells from a $P_{k-1}$ -cell can be alternatively modeled as an AD-type transition (exponential waiting time with rate $\mu_{k-1}(\cdot)$ )                                                   |
| $f_{k-1}(\cdot)$   | AD-type transition density function                      |                                                                                                                                                                                                                          |
| $X$                | Number of susceptible normal stem cells                  | For the colon, $X$ is assumed to be equal to $10^8$                                                                                                                                                                      |
| $\alpha(\cdot)$    | Cell division rate of adenoma stem cells                 | Per cell per year                                                                                                                                                                                                        |
| $\beta(\cdot)$     | Cell death or differentiation rate of adenoma stem cells | Per cell per year                                                                                                                                                                                                        |
| $P_K$ -cell        | Progenitor cell of an adenoma                            | $P_K$ -cells generate initiated cells with rate $\mu_K(\cdot)$ . Initiated cells then grow according to a Birth-Death process with rates $\alpha(\cdot)$ and $\beta(\cdot)$ . Each progenitor cell generates one adenoma |
|                    | Sub-clone                                                | Progenitor cells ( $P_K$ -cells) continuously generate new initiated cells. Each new initiated cells generates a sub-clone of adenoma cells independently of the other initiated cells                                   |
|                    | Adenoma or adenomatous polyps                            | Progeny of a progenitor cell ( $P_K$ -cell). The total number of stem cells in an adenoma is equal to the sum of cells in the sub-clones originated from a single progenitor cell                                        |

**Table 1.** (Continued)

| Symbol                  | Description                                                                                                                                                 | Details                                                                                                                |
|-------------------------|-------------------------------------------------------------------------------------------------------------------------------------------------------------|------------------------------------------------------------------------------------------------------------------------|
| $N(t)$                  | Number of detectable adenomas                                                                                                                               | We assume that adenomas are "detectable" with probability one when their sizes are greater than $y_0$                  |
| $Y_i(t)$                | Size of the $i$ -th detectable adenoma                                                                                                                      | Size is given in number of adenoma stem cells. Detectable means of size greater than $y_0$                             |
| $s_k$                   | Time of a $P_k$ -mutation                                                                                                                                   | $k = 1, \dots, K$ . $s_K$ denotes the arrival time for a progenitor cell, i.e., the onset of the corresponding adenoma |
| $Y(s_1, \dots, s_K, t)$ | Size of an adenoma at time $t$ , given that the originating $P_1$ -, $P_2$ -, ..., $P_K$ -mutations occurred at times $s_1, s_2, \dots, s_K$ , respectively |                                                                                                                        |
| $p_n(s_K, t)$           | Probability that an adenoma originated at time $s_K$ has size $n$ at time $t$                                                                               |                                                                                                                        |
| $p_n^*(s_K, t)$         | $p_n(t, s_K)$ conditional on not having been previously diagnosed with cancer                                                                               |                                                                                                                        |
| *                       | In general it applies to quantities computed conditioning on not having been previously diagnosed with cancer                                               |                                                                                                                        |
| $p_K^{(1)}(s_K, t)$     | Probability that an adenoma is detectable at time $t$ , given that it originated at time $s_K$                                                              | Detectable means of size greater than $y_0$                                                                            |
| $p_k^{(K)}(s_k, t)$     | Probability that a $P_k$ -mutation that occurred at time $s_k$ leads to at least one detectable adenoma by time $t$                                         |                                                                                                                        |
| $L_K$                   | Likelihood for the number and size of detectable adenomas                                                                                                   | $K$ denotes the number of pre-initiation stages in the model                                                           |
